# Supplementary material
Source: PubMed Central journal article supplement (PMC7443997)
Supplement: DS_10.1177_0022034520926139.pdf [file DS_10.1177_0022034520926139.pdf]

## SUPPLEMENTAL APPENDIX

### Interdental Cleaning and Oral Health Status in an Adult Cohort, 2015-2018

Benjamin W. Chaffee

Divya Persai

Manali V. Vora

University of California San Francisco School of Dentistry

|                          |                                                                                                                                    |         |
|--------------------------|------------------------------------------------------------------------------------------------------------------------------------|---------|
| <b>Appendix Table 1.</b> | Cross-sectional associations between interdental cleaning and oral health: all covariables shown .....                             | Page 2  |
| <b>Appendix Table 2.</b> | Longitudinal associations between interdental cleaning and oral health: all covariables shown .....                                | Page 4  |
| <b>Appendix Table 3.</b> | Longitudinal associations between interdental cleaning and oral health (new events): all covariables shown .....                   | Page 6  |
| <b>Appendix Table 4.</b> | Associations between interdental cleaning and oral health: interdental cleaning specified as a three-level category .....          | Page 8  |
| <b>Appendix Table 5.</b> | Associations between interdental cleaning and oral health: Wave 4 tooth brushing behavior included as model covariable .....       | Page 9  |
| <b>Appendix Table 6.</b> | Longitudinal associations between interdental cleaning and oral health: collider bias assessment .....                             | Page 10 |
| <b>Appendix Table 7.</b> | Associations between interdental cleaning and oral health: complete case analysis with balanced repeated replicate weighting ..... | Page 11 |
| <b>Appendix Table 8.</b> | Associations between interdental cleaning and oral health: complete case analysis with survey weighting .....                      | Page 12 |

Correspondence:

Benjamin Chaffee <[benjamin.chaffee@ucsf.edu](mailto:benjamin.chaffee@ucsf.edu)>

**Appendix Table 1. Cross-sectional associations between interdental cleaning and oral health: all covariables shown**

| <b>OUTCOME &gt;</b>         | <b>SELF-RATED ORAL HEALTH EXCELLENT</b> | <b>EVER TOOTH EXTRACTION</b> | <b>EVER GUM BLEEDING</b> | <b>EVER LOOSE TEETH</b> | <b>EVER BONE LOSS</b> | <b>EVER GUM DISEASE</b> |
|-----------------------------|-----------------------------------------|------------------------------|--------------------------|-------------------------|-----------------------|-------------------------|
|                             | AOR (95% CI)                            | AOR (95% CI)                 | AOR (95% CI)             | AOR (95% CI)            | AOR (95% CI)          | AOR (95% CI)            |
| <b>Interdental cleaning</b> |                                         |                              |                          |                         |                       |                         |
| None                        | (reference)                             | (reference)                  | (reference)              | (reference)             | (reference)           | (reference)             |
| 1-2 times/week              | 0.71 (0.60, 0.84)                       | 1.49 (1.30, 1.71)            | 1.25 (1.11, 1.39)        | 0.98 (0.82, 1.16)       | 1.28 (1.02, 1.60)     | 1.03 (0.87, 1.21)       |
| 3-4 times/week              | 0.88 (0.73, 1.05)                       | 1.39 (1.20, 1.63)            | 1.23 (1.08, 1.38)        | 1.08 (0.89, 1.32)       | 1.10 (0.87, 1.39)     | 1.04 (0.87, 1.24)       |
| 5-6 times/week              | 1.03 (0.86, 1.23)                       | 1.40 (1.20, 1.64)            | 0.99 (0.86, 1.13)        | 0.98 (0.79, 1.21)       | 1.39 (1.09, 1.77)     | 1.05 (0.87, 1.26)       |
| ≥7 times/week               | 1.37 (1.17, 1.59)                       | 1.34 (1.18, 1.52)            | 0.70 (0.63, 0.78)        | 0.95 (0.81, 1.11)       | 1.38 (1.14, 1.67)     | 0.96 (0.83, 1.11)       |
| <b>Age</b>                  |                                         |                              |                          |                         |                       |                         |
| 18-24 years                 | (reference)                             | (reference)                  | (reference)              | (reference)             | (reference)           | (reference)             |
| 25-34 years                 | 0.72 (0.62, 0.82)                       | 2.90 (2.54, 3.31)            | 1.16 (1.05, 1.28)        | 1.54 (1.29, 1.85)       | 1.75 (1.34, 2.29)     | 2.06 (1.73, 2.45)       |
| 35-44 years                 | 0.68 (0.58, 0.80)                       | 5.27 (4.57, 6.08)            | 1.00 (0.89, 1.12)        | 2.38 (1.96, 2.87)       | 3.39 (2.66, 4.32)     | 3.12 (2.60, 3.75)       |
| 45-54 years                 | 0.55 (0.46, 0.65)                       | 7.01 (6.08, 8.08)            | 0.95 (0.84, 1.07)        | 3.60 (2.98, 4.35)       | 4.93 (3.90, 6.24)     | 4.28 (3.56, 5.15)       |
| 55-64 years                 | 0.54 (0.45, 0.65)                       | 11.1 (9.50, 12.9)            | 0.68 (0.60, 0.78)        | 4.17 (3.42, 5.08)       | 8.52 (6.76, 10.7)     | 5.01 (4.16, 6.04)       |
| ≥65 years                   | 0.54 (0.44, 0.65)                       | 16.6 (14.1, 19.6)            | 0.42 (0.36, 0.49)        | 3.30 (2.61, 4.18)       | 7.59 (5.93, 9.72)     | 4.41 (3.59, 5.42)       |
| <b>Sex</b>                  |                                         |                              |                          |                         |                       |                         |
| Male                        | (reference)                             | (reference)                  | (reference)              | (reference)             | (reference)           | (reference)             |
| Female                      | 1.22 (1.10, 1.37)                       | 0.94 (0.86, 1.04)            | 0.91 (0.84, 0.98)        | 0.82 (0.72, 0.92)       | 0.89 (0.77, 1.02)     | 0.92 (0.82, 1.03)       |
| <b>Race/ethnicity</b>       |                                         |                              |                          |                         |                       |                         |
| Non-Hispanic White          | (reference)                             | (reference)                  | (reference)              | (reference)             | (reference)           | (reference)             |
| Non-Hispanic Black          | 0.90 (0.78, 1.05)                       | 1.52 (1.34, 1.72)            | 0.67 (0.60, 0.75)        | 1.34 (1.14, 1.58)       | 1.06 (0.88, 1.28)     | 1.01 (0.87, 1.18)       |
| Non-Hispanic Other          | 0.75 (0.59, 0.96)                       | 1.08 (0.88, 1.33)            | 0.73 (0.62, 0.86)        | 1.24 (0.94, 1.64)       | 0.97 (0.71, 1.33)     | 1.17 (0.92, 1.48)       |
| Hispanic/Latinx             | 0.80 (0.69, 0.93)                       | 1.06 (0.93, 1.21)            | 0.71 (0.63, 0.79)        | 1.02 (0.86, 1.22)       | 0.99 (0.80, 1.22)     | 0.93 (0.79, 1.10)       |
| <b>Annual income</b>        |                                         |                              |                          |                         |                       |                         |
| <\$10,000                   | (reference)                             | (reference)                  | (reference)              | (reference)             | (reference)           | (reference)             |
| \$10,000 - \$24,999         | 0.76 (0.61, 0.94)                       | 1.04 (0.89, 1.23)            | 1.04 (0.90, 1.19)        | 0.75 (0.62, 0.90)       | 0.76 (0.59, 0.99)     | 0.92 (0.76, 1.11)       |
| \$25,000 - \$49,999         | 0.78 (0.63, 0.97)                       | 0.88 (0.74, 1.04)            | 1.03 (0.90, 1.19)        | 0.60 (0.49, 0.73)       | 0.94 (0.74, 1.21)     | 0.89 (0.73, 1.09)       |
| \$50,000 - \$99,999         | 1.03 (0.84, 1.27)                       | 0.71 (0.60, 0.85)            | 1.04 (0.90, 1.20)        | 0.44 (0.35, 0.54)       | 0.80 (0.06, 1.05)     | 0.78 (0.64, 0.96)       |
| ≥\$100,000                  | 1.41 (1.14, 1.75)                       | 0.52 (0.42, 0.64)            | 0.95 (0.81, 1.12)        | 0.31 (0.22, 0.42)       | 0.81 (0.60, 1.10)     | 0.63 (0.50, 0.80)       |
| <b>Education</b>            |                                         |                              |                          |                         |                       |                         |
| Below high school           | (reference)                             | (reference)                  | (reference)              | (reference)             | (reference)           | (reference)             |
| High school or GED          | 1.07 (0.85, 1.35)                       | 0.92 (0.79, 1.07)            | 1.03 (0.90, 1.19)        | 0.85 (0.72, 1.02)       | 0.99 (0.77, 1.27)     | 0.95 (0.78, 1.15)       |
| Some college                | 1.13 (0.91, 1.41)                       | 0.76 (0.65, 0.89)            | 1.24 (1.08, 1.43)        | 0.87 (0.73, 1.05)       | 1.07 (0.83, 1.39)     | 1.23 (1.00, 1.50)       |
| College degree              | 1.58 (1.25, 2.00)                       | 0.47 (0.40, 0.56)            | 1.28 (1.09, 1.50)        | 0.56 (0.44, 0.72)       | 1.00 (0.75, 1.33)     | 1.22 (0.98, 1.52)       |

|                        |                   |                   |                   |                   |                   |                   |
|------------------------|-------------------|-------------------|-------------------|-------------------|-------------------|-------------------|
| Diabetes history       |                   |                   |                   |                   |                   |                   |
| Never                  | (reference)       | (reference)       | (reference)       | (reference)       | (reference)       | (reference)       |
| Ever                   | 0.69 (0.58, 0.83) | 1.21 (1.07, 1.36) | 1.13 (1.01, 1.27) | 1.27 (1.09, 1.49) | 1.39 (1.19, 1.64) | 1.52 (1.33, 1.74) |
| Body mass index        |                   |                   |                   |                   |                   |                   |
| <18.5                  | 1.04 (0.75, 1.43) | 1.67 (1.24, 2.25) | 1.11 (0.86, 1.43) | 2.19 (1.49, 3.23) | 1.28 (0.78, 2.10) | 0.96 (0.66, 1.40) |
| 18.5 - 24.99           | (reference)       | (reference)       | (reference)       | (reference)       | (reference)       | (reference)       |
| 25 - 29.99             | 0.87 (0.77, 0.99) | 1.22 (1.09, 1.37) | 1.04 (0.94, 1.14) | 1.01 (0.86, 1.18) | 0.91 (0.77, 1.08) | 0.93 (0.81, 1.07) |
| ≥30                    | 0.79 (0.69, 0.91) | 1.35 (1.20, 1.51) | 1.18 (1.07, 1.30) | 1.21 (1.04, 1.42) | 1.12 (0.95, 1.33) | 1.15 (1.01, 1.32) |
| Recent dental cleaning |                   |                   |                   |                   |                   |                   |
| No                     | (reference)       | (reference)       | (reference)       | (reference)       | (reference)       | (reference)       |
| Yes (past 12-mos.)     | 1.98 (1.73, 2.27) | 0.90 (0.81, 0.99) | 0.87 (0.80, 0.95) | 0.63 (0.55, 0.72) | 1.71 (1.45, 2.01) | 1.41 (1.25, 1.59) |
| Alcohol use            |                   |                   |                   |                   |                   |                   |
| None                   | (reference)       | (reference)       | (reference)       | (reference)       | (reference)       | (reference)       |
| Light                  | 0.96 (0.85, 1.09) | 0.95 (0.85, 1.05) | 1.35 (1.23, 1.49) | 1.02 (0.88, 1.19) | 1.05 (0.89, 1.24) | 1.10 (0.97, 1.26) |
| Moderate               | 0.93 (0.80, 1.08) | 0.90 (0.79, 1.04) | 1.30 (1.16, 1.46) | 0.97 (0.80, 1.17) | 1.11 (0.90, 1.36) | 1.02 (0.86, 1.20) |
| Heavy                  | 0.99 (0.81, 1.20) | 0.96 (0.82, 1.12) | 1.66 (1.44, 1.90) | 1.27 (1.04, 1.57) | 1.10 (0.88, 1.38) | 1.09 (0.91, 1.30) |
| Cannabis use           |                   |                   |                   |                   |                   |                   |
| None                   | (reference)       | (reference)       | (reference)       | (reference)       | (reference)       | (reference)       |
| Within past 30 days    | 0.80 (0.69, 0.92) | 1.08 (0.97, 1.22) | 1.40 (1.27, 1.54) | 1.42 (1.23, 1.64) | 1.25 (1.04, 1.49) | 1.11 (0.96, 1.28) |
| Cigarette smoking      |                   |                   |                   |                   |                   |                   |
| Never                  | (reference)       | (reference)       | (reference)       | (reference)       | (reference)       | (reference)       |
| Former                 | 0.78 (0.67, 0.89) | 1.31 (1.17, 1.48) | 1.19 (1.07, 1.32) | 1.26 (1.06, 1.5)  | 1.40 (1.18, 1.65) | 1.47 (1.28, 1.68) |
| Current light          | 0.56 (0.48, 0.66) | 1.44 (1.28, 1.63) | 0.77 (0.70, 0.86) | 1.50 (1.28, 1.77) | 1.61 (1.35, 1.94) | 1.61 (1.40, 1.85) |
| Current heavy          | 0.41 (0.34, 0.50) | 2.01 (1.75, 2.29) | 0.77 (0.69, 0.87) | 2.10 (1.78, 2.48) | 2.07 (1.72, 2.49) | 2.04 (1.76, 2.37) |
| E-cigarette use        |                   |                   |                   |                   |                   |                   |
| Not currently          | (reference)       | (reference)       | (reference)       | (reference)       | (reference)       | (reference)       |
| Currently              | 1.11 (0.90, 1.36) | 1.26 (1.09, 1.46) | 1.13 (0.98, 1.29) | 1.22 (0.99, 1.50) | 1.29 (1.01, 1.65) | 1.31 (1.10, 1.55) |
| Other combustible use  |                   |                   |                   |                   |                   |                   |
| Not currently          | (reference)       | (reference)       | (reference)       | (reference)       | (reference)       | (reference)       |
| Currently              | 1.13 (0.93, 1.37) | 1.03 (0.89, 1.20) | 0.96 (0.84, 1.10) | 1.08 (0.90, 1.31) | 1.25 (0.99, 1.58) | 1.10 (0.93, 1.31) |
| Smokeless tobacco use  |                   |                   |                   |                   |                   |                   |
| Not currently          | (reference)       | (reference)       | (reference)       | (reference)       | (reference)       | (reference)       |
| Currently              | 0.58 (0.44, 0.76) | 0.95 (0.79, 1.13) | 0.86 (0.74, 1.00) | 1.14 (0.90, 1.43) | 0.78 (0.58, 1.04) | 0.84 (0.67, 1.05) |

Models weighted using Wave 3 cross-sectional weights and survey weighting.  
Abbreviations: AOR = adjusted odds ratio; CI = confidence interval

**Appendix Table 2. Longitudinal associations between interdental cleaning and oral health: all covariables shown**

| <b>OUTCOME &gt;</b>         | <b>SELF-RATED ORAL HEALTH EXCELLENT</b> | <b>PAST 12-MO. TOOTH EXTRACTION</b> | <b>PAST 12-MO. GUM BLEEDING</b> | <b>PAST 12-MO. LOOSE TEETH</b> | <b>PAST 12-MO. BONE LOSS</b> | <b>PAST 12-MO. GUM DISEASE</b> |
|-----------------------------|-----------------------------------------|-------------------------------------|---------------------------------|--------------------------------|------------------------------|--------------------------------|
|                             | AOR (95% CI)                            | AOR (95% CI)                        | AOR (95% CI)                    | AOR (95% CI)                   | AOR (95% CI)                 | AOR (95% CI)                   |
| <b>Interdental cleaning</b> |                                         |                                     |                                 |                                |                              |                                |
| None                        | (reference)                             | (reference)                         | (reference)                     | (reference)                    | (reference)                  | (reference)                    |
| 1-2 times/week              | 0.86 (0.72, 1.02)                       | 1.42 (1.17, 1.73)                   | 1.12 (0.99, 1.27)               | 0.99 (0.77, 1.27)              | 1.20 (0.85, 1.68)            | 1.03 (0.74, 1.43)              |
| 3-4 times/week              | 0.89 (0.74, 1.07)                       | 1.10 (0.89, 1.37)                   | 1.02 (0.89, 1.18)               | 1.01 (0.77, 1.33)              | 0.95 (0.67, 1.36)            | 0.97 (0.69, 1.38)              |
| 5-6 times/week              | 1.13 (0.93, 1.37)                       | 1.10 (0.87, 1.40)                   | 0.84 (0.72, 0.97)               | 1.15 (0.87, 1.53)              | 1.14 (0.80, 1.62)            | 1.08 (0.77, 1.51)              |
| ≥7 times/week               | 1.37 (1.17, 1.62)                       | 1.10 (0.92, 1.32)                   | 0.62 (0.54, 0.70)               | 0.89 (0.70, 1.12)              | 1.15 (0.85, 1.55)            | 0.87 (0.65, 1.16)              |
| <b>Age</b>                  |                                         |                                     |                                 |                                |                              |                                |
| 18-24 years                 | (reference)                             | (reference)                         | (reference)                     | (reference)                    | (reference)                  | (reference)                    |
| 25-34 years                 | 0.78 (0.67, 0.90)                       | 1.95 (1.59, 2.38)                   | 0.77 (0.67, 0.88)               | 2.66 (2.04, 3.48)              | 2.63 (1.84, 3.75)            | 2.26 (1.60, 3.19)              |
| 35-44 years                 | 0.68 (0.57, 0.80)                       | 2.81 (2.30, 3.43)                   | 0.68 (0.59, 0.78)               | 3.70 (2.79, 4.89)              | 4.33 (3.03, 6.16)            | 3.06 (2.14, 4.38)              |
| 45-54 years                 | 0.63 (0.53, 0.76)                       | 2.98 (2.43, 3.66)                   | 0.47 (0.40, 0.55)               | 3.54 (2.65, 4.73)              | 4.58 (3.21, 6.55)            | 2.84 (2.00, 4.05)              |
| 55-64 years                 | 0.51 (0.42, 0.62)                       | 2.99 (2.33, 3.84)                   | 0.20 (0.16, 0.25)               | 2.77 (1.97, 3.91)              | 4.23 (2.85, 6.27)            | 2.23 (1.47, 3.39)              |
| ≥65 years                   | 0.58 (0.47, 0.71)                       | 1.95 (1.59, 2.38)                   | 0.77 (0.67, 0.88)               | 2.66 (2.04, 3.48)              | 2.63 (1.84, 3.75)            | 2.26 (1.60, 3.19)              |
| <b>Sex</b>                  |                                         |                                     |                                 |                                |                              |                                |
| Male                        | (reference)                             | (reference)                         | (reference)                     | (reference)                    | (reference)                  | (reference)                    |
| Female                      | 1.26 (1.12, 1.41)                       | 0.92 (0.80, 1.05)                   | 1.03 (0.94, 1.13)               | 1.01 (0.84, 1.21)              | 0.90 (0.73, 1.10)            | 0.97 (0.78, 1.20)              |
| <b>Race/ethnicity</b>       |                                         |                                     |                                 |                                |                              |                                |
| Non-Hispanic White          | (reference)                             | (reference)                         | (reference)                     | (reference)                    | (reference)                  | (reference)                    |
| Non-Hispanic Black          | 0.88 (0.75, 1.03)                       | 1.46 (1.23, 1.74)                   | 0.68 (0.60, 0.77)               | 1.40 (1.12, 1.75)              | 1.41 (1.07, 1.85)            | 1.35 (1.01, 1.79)              |
| Non-Hispanic Other          | 0.61 (0.47, 0.79)                       | 1.18 (0.87, 1.60)                   | 1.06 (0.89, 1.27)               | 1.28 (0.87, 1.90)              | 1.46 (0.95, 2.23)            | 1.72 (1.13, 2.61)              |
| Hispanic/Latinx             | 0.86 (0.73, 1.01)                       | 1.12 (0.93, 1.34)                   | 0.82 (0.73, 0.93)               | 0.97 (0.77, 1.23)              | 1.09 (0.80, 1.49)            | 0.72 (0.52, 1.00)              |
| <b>Annual income</b>        |                                         |                                     |                                 |                                |                              |                                |
| <\$10,000                   | (reference)                             | (reference)                         | (reference)                     | (reference)                    | (reference)                  | (reference)                    |
| \$10,000 - \$24,999         | 0.76 (0.60, 0.96)                       | 0.71 (0.58, 0.86)                   | 0.94 (0.81, 1.09)               | 0.85 (0.68, 1.06)              | 0.62 (0.42, 0.91)            | 0.70 (0.47, 1.04)              |
| \$25,000 - \$49,999         | 0.82 (0.66, 1.01)                       | 0.59 (0.48, 0.72)                   | 0.93 (0.80, 1.08)               | 0.61 (0.48, 0.78)              | 0.48 (0.33, 0.70)            | 0.63 (0.42, 0.95)              |
| \$50,000 - \$99,999         | 1.06 (0.86, 1.30)                       | 0.45 (0.36, 0.57)                   | 0.87 (0.74, 1.02)               | 0.42 (0.31, 0.57)              | 0.46 (0.30, 0.71)            | 0.53 (0.34, 0.83)              |
| ≥\$100,000                  | 1.36 (1.09, 1.70)                       | 0.33 (0.25, 0.45)                   | 0.91 (0.76, 1.09)               | 0.42 (0.28, 0.64)              | 0.41 (0.25, 0.66)            | 0.41 (0.25, 0.66)              |
| <b>Education</b>            |                                         |                                     |                                 |                                |                              |                                |
| Below high school           | (reference)                             | (reference)                         | (reference)                     | (reference)                    | (reference)                  | (reference)                    |
| High school or GED          | 1.02 (0.80, 1.29)                       | 0.80 (0.66, 0.97)                   | 1.15 (0.98, 1.34)               | 0.81 (0.64, 1.03)              | 0.98 (0.66, 1.45)            | 1.28 (0.82, 2.00)              |
| Some college                | 1.07 (0.85, 1.34)                       | 0.63 (0.51, 0.77)                   | 1.29 (1.10, 1.52)               | 0.84 (0.65, 1.09)              | 0.99 (0.66, 1.48)            | 1.04 (0.66, 1.62)              |
| College degree              | 1.48 (1.16, 1.88)                       | 0.42 (0.32, 0.55)                   | 1.44 (1.20, 1.72)               | 0.50 (0.35, 0.73)              | 0.75 (0.48, 1.19)            | 1.16 (0.71, 1.89)              |

|                        |                   |                   |                   |                   |                   |                   |
|------------------------|-------------------|-------------------|-------------------|-------------------|-------------------|-------------------|
| Diabetes history       |                   |                   |                   |                   |                   |                   |
| Never                  | (reference)       | (reference)       | (reference)       | (reference)       | (reference)       | (reference)       |
| Ever                   | 0.88 (0.74, 1.05) | 1.25 (1.06, 1.48) | 1.26 (1.10, 1.45) | 1.32 (1.07, 1.63) | 1.33 (1.04, 1.7)  | 1.53 (1.17, 1.99) |
| Body mass index        |                   |                   |                   |                   |                   |                   |
| <18.5                  | 1.31 (0.91, 1.87) | 1.46 (0.98, 2.17) | 1.20 (0.90, 1.61) | 1.71 (1.04, 2.82) | 1.12 (0.59, 2.14) | 2.31 (1.30, 4.10) |
| 18.5 - 24.99           | (reference)       | (reference)       | (reference)       | (reference)       | (reference)       | (reference)       |
| 25 - 29.99             | 0.96 (0.84, 1.10) | 1.28 (1.07, 1.52) | 1.01 (0.91, 1.13) | 0.88 (0.70, 1.11) | 0.94 (0.74, 1.21) | 1.31 (1.00, 1.72) |
| ≥30                    | 0.85 (0.74, 0.99) | 1.44 (1.21, 1.71) | 1.23 (1.10, 1.38) | 1.16 (0.93, 1.44) | 1.05 (0.82, 1.34) | 1.24 (0.95, 1.62) |
| Recent dental cleaning |                   |                   |                   |                   |                   |                   |
| No                     | (reference)       | (reference)       | (reference)       | (reference)       | (reference)       | (reference)       |
| Yes (past 12-mos.)     | 1.79 (1.57, 2.06) | 0.89 (0.77, 1.03) | 0.76 (0.69, 0.84) | 0.59 (0.49, 0.70) | 0.74 (0.58, 0.95) | 0.76 (0.60, 0.96) |
| Alcohol use            |                   |                   |                   |                   |                   |                   |
| None                   | (reference)       | (reference)       | (reference)       | (reference)       | (reference)       | (reference)       |
| Light                  | 0.96 (0.84, 1.10) | 0.89 (0.76, 1.04) | 1.17 (1.05, 1.31) | 0.98 (0.80, 1.21) | 1.05 (0.81, 1.35) | 1.12 (0.86, 1.45) |
| Moderate               | 0.98 (0.84, 1.15) | 0.81 (0.65, 1.00) | 1.12 (0.98, 1.28) | 0.78 (0.61, 1.01) | 1.03 (0.75, 1.41) | 0.90 (0.65, 1.24) |
| Heavy                  | 1.04 (0.85, 1.28) | 0.75 (0.59, 0.96) | 1.24 (1.06, 1.45) | 1.01 (0.75, 1.37) | 1.71 (1.22, 2.39) | 1.23 (0.87, 1.73) |
| Cannabis use           |                   |                   |                   |                   |                   |                   |
| None                   | (reference)       | (reference)       | (reference)       | (reference)       | (reference)       | (reference)       |
| Within past 30 days    | 0.80 (0.68, 0.93) | 1.09 (0.94, 1.26) | 1.42 (1.28, 1.58) | 1.57 (1.30, 1.88) | 1.18 (0.89, 1.56) | 1.14 (0.89, 1.45) |
| Cigarette smoking      |                   |                   |                   |                   |                   |                   |
| Never                  | (reference)       | (reference)       | (reference)       | (reference)       | (reference)       | (reference)       |
| Former                 | 0.98 (0.85, 1.14) | 1.22 (1.01, 1.47) | 1.23 (1.08, 1.39) | 1.49 (1.16, 1.91) | 1.53 (1.19, 1.96) | 1.24 (0.95, 1.62) |
| Current light          | 0.51 (0.43, 0.61) | 1.62 (1.38, 1.90) | 0.95 (0.85, 1.06) | 2.18 (1.75, 2.71) | 1.78 (1.38, 2.30) | 1.63 (1.26, 2.11) |
| Current heavy          | 0.37 (0.30, 0.45) | 2.07 (1.73, 2.46) | 0.82 (0.72, 0.94) | 2.46 (1.95, 3.11) | 2.32 (1.74, 3.09) | 2.10 (1.57, 2.80) |
| E-cigarette use        |                   |                   |                   |                   |                   |                   |
| Not currently          | (reference)       | (reference)       | (reference)       | (reference)       | (reference)       | (reference)       |
| Currently              | 0.92 (0.74, 1.14) | 1.13 (0.91, 1.39) | 1.03 (0.89, 1.18) | 1.03 (0.80, 1.33) | 1.05 (0.76, 1.43) | 1.09 (0.78, 1.52) |
| Other combustible use  |                   |                   |                   |                   |                   |                   |
| Not currently          | (reference)       | (reference)       | (reference)       | (reference)       | (reference)       | (reference)       |
| Currently              | 1.07 (0.86, 1.32) | 1.20 (0.99, 1.46) | 0.94 (0.81, 1.10) | 1.16 (0.92, 1.47) | 1.09 (0.77, 1.54) | 1.10 (0.78, 1.56) |
| Smokeless tobacco use  |                   |                   |                   |                   |                   |                   |
| Not currently          | (reference)       | (reference)       | (reference)       | (reference)       | (reference)       | (reference)       |
| Currently              | 0.51 (0.39, 0.66) | 1.38 (1.07, 1.79) | 0.94 (0.78, 1.12) | 1.31 (0.92, 1.86) | 1.04 (0.63, 1.74) | 1.84 (1.18, 2.86) |

Models weighted using Wave 4 all-wave longitudinal weights and survey weighting.  
Abbreviations: AOR = adjusted odds ratio; CI = confidence interval

**Appendix Table 3. Longitudinal associations between interdental cleaning and oral health (new events): all covariables shown**

| <b>OUTCOME &gt;</b>         | <b>PAST 12-MO. TOOTH<br/>EXTRACTION</b> | <b>PAST 12-MO. GUM<br/>BLEEDING</b> | <b>PAST 12-MO.<br/>LOOSE TEETH</b> | <b>PAST 12-MO.<br/>BONE LOSS</b> | <b>PAST 12-MO.<br/>GUM DISEASE</b> |
|-----------------------------|-----------------------------------------|-------------------------------------|------------------------------------|----------------------------------|------------------------------------|
|                             | AOR (95% CI)                            | AOR (95% CI)                        | AOR (95% CI)                       | AOR (95% CI)                     | AOR (95% CI)                       |
| <b>Interdental cleaning</b> |                                         |                                     |                                    |                                  |                                    |
| None                        | (reference)                             | (reference)                         | (reference)                        | (reference)                      | (reference)                        |
| 1-2 times/week              | 1.22 (0.88, 1.71)                       | 1.20 (0.96, 1.50)                   | 1.05 (0.73, 1.53)                  | 1.57 (1.02, 2.43)                | 0.91 (0.54, 1.53)                  |
| 3-4 times/week              | 0.92 (0.65, 1.31)                       | 1.12 (0.87, 1.43)                   | 1.13 (0.73, 1.76)                  | 0.96 (0.58, 1.58)                | 0.53 (0.28, 0.98)                  |
| 5-6 times/week              | 0.56 (0.37, 0.85)                       | 0.81 (0.62, 1.06)                   | 1.25 (0.83, 1.88)                  | 1.18 (0.73, 1.89)                | 0.56 (0.03, 1.04)                  |
| ≥7 times/week               | 1.35 (1.01, 1.82)                       | 0.86 (0.69, 1.06)                   | 1.05 (0.73, 1.51)                  | 1.14 (0.76, 1.71)                | 0.69 (0.41, 1.16)                  |
| <b>Age</b>                  |                                         |                                     |                                    |                                  |                                    |
| 18-24 years                 | (reference)                             | (reference)                         | (reference)                        | (reference)                      | (reference)                        |
| 25-34 years                 | 1.26 (0.93, 1.71)                       | 0.81 (0.67, 0.97)                   | 1.37 (0.97, 1.95)                  | 2.13 (1.36, 3.31)                | 1.66 (0.97, 2.82)                  |
| 35-44 years                 | 1.30 (0.92, 1.85)                       | 0.55 (0.43, 0.69)                   | 1.62 (1.12, 2.35)                  | 2.11 (1.33, 3.36)                | 1.51 (0.86, 2.66)                  |
| 45-54 years                 | 1.96 (1.39, 2.76)                       | 0.58 (0.44, 0.75)                   | 2.31 (1.54, 3.45)                  | 3.63 (2.30, 5.71)                | 1.50 (0.81, 2.79)                  |
| 55-64 years                 | 2.04 (1.40, 2.96)                       | 0.32 (0.24, 0.43)                   | 2.17 (1.44, 3.27)                  | 2.55 (1.55, 4.21)                | 1.62 (0.83, 3.17)                  |
| ≥65 years                   | 2.38 (1.49, 3.80)                       | 0.13 (0.09, 0.19)                   | 1.84 (1.14, 2.99)                  | 2.95 (1.62, 5.37)                | 1.29 (0.66, 2.53)                  |
| <b>Sex</b>                  |                                         |                                     |                                    |                                  |                                    |
| Male                        | (reference)                             | (reference)                         | (reference)                        | (reference)                      | (reference)                        |
| Female                      | 0.97 (0.76, 1.24)                       | 1.17 (0.99, 1.38)                   | 1.00 (0.75, 1.32)                  | 0.94 (0.71, 1.25)                | 1.01 (0.68, 1.50)                  |
| <b>Race/ethnicity</b>       |                                         |                                     |                                    |                                  |                                    |
| Non-Hispanic White          | (reference)                             | (reference)                         | (reference)                        | (reference)                      | (reference)                        |
| Non-Hispanic Black          | 2.04 (1.53, 2.71)                       | 0.92 (0.73, 1.14)                   | 1.55 (1.12, 2.13)                  | 1.52 (1.02, 2.28)                | 1.05 (0.65, 1.71)                  |
| Non-Hispanic Other          | 1.79 (1.07, 3.00)                       | 1.28 (0.93, 1.76)                   | 1.13 (0.63, 2.05)                  | 2.14 (1.25, 3.65)                | 1.43 (0.69, 2.99)                  |
| Hispanic/Latinx             | 1.53 (1.11, 2.10)                       | 1.15 (0.92, 1.42)                   | 0.97 (0.69, 1.36)                  | 1.36 (0.89, 2.07)                | 0.68 (0.39, 1.21)                  |
| <b>Annual income</b>        |                                         |                                     |                                    |                                  |                                    |
| <\$10,000                   | (reference)                             | (reference)                         | (reference)                        | (reference)                      | (reference)                        |
| \$10,000 - \$24,999         | 0.81 (0.58, 1.11)                       | 0.82 (0.65, 1.05)                   | 0.66 (0.48, 0.92)                  | 0.57 (0.35, 0.93)                | 0.71 (0.38, 1.31)                  |
| \$25,000 - \$49,999         | 0.60 (0.41, 0.86)                       | 0.75 (0.58, 0.96)                   | 0.54 (0.38, 0.77)                  | 0.46 (0.28, 0.76)                | 0.74 (0.41, 1.35)                  |
| \$50,000 - \$99,999         | 0.45 (0.30, 0.68)                       | 0.75 (0.56, 1.00)                   | 0.34 (0.21, 0.56)                  | 0.37 (0.21, 0.68)                | 0.60 (0.30, 1.21)                  |
| ≥\$100,000                  | 0.39 (0.23, 0.66)                       | 0.78 (0.56, 1.07)                   | 0.54 (0.33, 0.90)                  | 0.35 (0.18, 0.68)                | 0.39 (0.18, 0.83)                  |
| <b>Education</b>            |                                         |                                     |                                    |                                  |                                    |
| Below high school           | (reference)                             | (reference)                         | (reference)                        | (reference)                      | (reference)                        |
| High school or GED          | 0.71 (0.51, 1.00)                       | 1.07 (0.81, 1.42)                   | 0.91 (0.63, 1.32)                  | 1.13 (0.68, 1.87)                | 1.27 (0.66, 2.44)                  |
| Some college                | 0.48 (0.33, 0.69)                       | 1.23 (0.92, 1.64)                   | 0.79 (0.52, 1.19)                  | 0.97 (0.57, 1.65)                | 0.74 (0.38, 1.46)                  |
| College degree              | 0.48 (0.30, 0.76)                       | 1.58 (1.14, 2.19)                   | 0.42 (0.24, 0.72)                  | 0.84 (0.45, 1.58)                | 0.69 (0.33, 1.46)                  |

|                        |                   |                   |                   |                   |                   |
|------------------------|-------------------|-------------------|-------------------|-------------------|-------------------|
| Diabetes history       |                   |                   |                   |                   |                   |
| Never                  | (reference)       | (reference)       | (reference)       | (reference)       | (reference)       |
| Ever                   | 1.17 (0.85, 1.61) | 1.30 (1.02, 1.65) | 1.35 (0.95, 1.91) | 1.31 (0.89, 1.92) | 1.59 (0.93, 2.74) |
| Body mass index        |                   |                   |                   |                   |                   |
| <18.5                  | 1.96 (1.04, 3.70) | 1.11 (0.64, 1.92) | 1.44 (0.63, 3.32) | 1.16 (0.54, 2.52) | 3.11 (1.36, 7.09) |
| 18.5 - 24.99           | (reference)       | (reference)       | (reference)       | (reference)       | (reference)       |
| 25 - 29.99             | 1.34 (0.99, 1.81) | 0.96 (0.79, 1.16) | 0.94 (0.67, 1.33) | 0.94 (0.67, 1.32) | 1.21 (0.74, 1.99) |
| ≥30                    | 1.38 (1.01, 1.88) | 1.03 (0.86, 1.25) | 0.97 (0.70, 1.34) | 0.80 (0.56, 1.13) | 1.30 (0.78, 2.14) |
| Recent dental cleaning |                   |                   |                   |                   |                   |
| No                     | (reference)       | (reference)       | (reference)       | (reference)       | (reference)       |
| Yes (past 12-mos.)     | 0.73 (0.57, 0.93) | 0.74 (0.62, 0.88) | 0.60 (0.46, 0.79) | 0.60 (0.44, 0.83) | 0.43 (0.29, 0.63) |
| Alcohol use            |                   |                   |                   |                   |                   |
| None                   | (reference)       | (reference)       | (reference)       | (reference)       | (reference)       |
| Light                  | 0.98 (0.74, 1.28) | 1.12 (0.93, 1.35) | 0.82 (0.59, 1.15) | 0.90 (0.62, 1.32) | 1.20 (0.77, 1.88) |
| Moderate               | 0.65 (0.45, 0.95) | 0.92 (0.72, 1.17) | 0.78 (0.54, 1.13) | 0.89 (0.55, 1.44) | 0.93 (0.47, 1.86) |
| Heavy                  | 0.75 (0.48, 1.17) | 0.96 (0.71, 1.29) | 1.10 (0.67, 1.81) | 1.61 (1.00, 2.57) | 1.39 (0.73, 2.65) |
| Cannabis use           |                   |                   |                   |                   |                   |
| None                   | (reference)       | (reference)       | (reference)       | (reference)       | (reference)       |
| Within past 30 days    | 0.86 (0.66, 1.11) | 1.35 (1.13, 1.62) | 1.40 (1.07, 1.84) | 1.28 (0.87, 1.89) | 1.14 (0.78, 1.67) |
| Cigarette smoking      |                   |                   |                   |                   |                   |
| Never                  | (reference)       | (reference)       | (reference)       | (reference)       | (reference)       |
| Former                 | 1.26 (0.89, 1.79) | 1.53 (1.22, 1.93) | 1.59 (1.09, 2.33) | 1.11 (0.75, 1.65) | 1.38 (0.85, 2.25) |
| Current light          | 1.99 (1.49, 2.67) | 1.38 (1.14, 1.65) | 2.23 (1.65, 3.03) | 1.74 (1.24, 2.45) | 1.48 (0.94, 2.33) |
| Current heavy          | 2.30 (1.66, 3.18) | 1.11 (0.88, 1.41) | 2.07 (1.43, 3.01) | 2.08 (1.39, 3.11) | 1.31 (0.75, 2.29) |
| E-cigarette use        |                   |                   |                   |                   |                   |
| Not currently          | (reference)       | (reference)       | (reference)       | (reference)       | (reference)       |
| Currently              | 0.98 (0.67, 1.43) | 1.10 (0.86, 1.41) | 1.01 (0.70, 1.47) | 0.97 (0.64, 1.48) | 0.61 (0.33, 1.12) |
| Other combustible use  |                   |                   |                   |                   |                   |
| Not currently          | (reference)       | (reference)       | (reference)       | (reference)       | (reference)       |
| Currently              | 1.29 (0.94, 1.77) | 1.03 (0.77, 1.38) | 1.27 (0.92, 1.76) | 1.16 (0.75, 1.82) | 1.04 (0.63, 1.71) |
| Smokeless tobacco use  |                   |                   |                   |                   |                   |
| Not currently          | (reference)       | (reference)       | (reference)       | (reference)       | (reference)       |
| Currently              | 1.30 (0.83, 2.02) | 0.87 (0.63, 1.20) | 0.85 (0.51, 1.41) | 1.42 (0.72, 2.82) | 1.51 (0.75, 3.07) |

Models weighted using Wave 4 all-wave longitudinal weights and survey weighting. Analyses restricted to respondents reporting no history of the outcome at Wave 3.

Abbreviations: AOR = adjusted odds ratio; CI = confidence interval

**Appendix Table 4. Associations between interdental cleaning and oral health: interdental cleaning specified as a three-level category**

|                                                                          | Cross-Sectional              | Longitudinal                 | Longitudinal (New Events)    |
|--------------------------------------------------------------------------|------------------------------|------------------------------|------------------------------|
| <b>OUTCOME &gt; SELF-RATED ORAL HEALTH EXCELLENT</b>                     |                              |                              |                              |
| Interdental cleaning                                                     | Adjusted Odds Ratio (95% CI) | Adjusted Odds Ratio (95% CI) |                              |
| None (reference)                                                         | --                           | --                           |                              |
| 1-4 times/week                                                           | 0.87 (0.76, 1.01)            | 0.96 (0.82, 1.11)            |                              |
| ≥5 times/week                                                            | 1.47 (1.28, 1.69)            | 1.48 (1.27, 1.71)            |                              |
| <b>OUTCOME &gt; EVER TOOTH EXTRACTION PAST 12-MONTH TOOTH EXTRACTION</b> |                              |                              |                              |
| Interdental cleaning                                                     | Adjusted Odds Ratio (95% CI) | Adjusted Odds Ratio (95% CI) | Adjusted Odds Ratio (95% CI) |
| None (reference)                                                         | --                           | --                           | --                           |
| 1-4 times/week                                                           | 1.42 (1.25, 1.60)            | 1.25 (1.06, 1.47)            | 1.09 (0.83, 1.44)            |
| ≥5 times/week                                                            | 1.31 (1.17, 1.48)            | 1.07 (0.91, 1.25)            | 1.13 (0.86, 1.48)            |
| <b>OUTCOME &gt; EVER GUM BLEEDING PAST 12-MONTH GUM BLEEDING</b>         |                              |                              |                              |
| Interdental cleaning                                                     | Adjusted Odds Ratio (95% CI) | Adjusted Odds Ratio (95% CI) | Adjusted Odds Ratio (95% CI) |
| None (reference)                                                         | --                           | --                           | --                           |
| 1-4 times/week                                                           | 1.20 (1.09, 1.32)            | 1.03 (0.93, 1.15)            | 1.10 (0.91, 1.33)            |
| ≥5 times/week                                                            | 0.75 (0.68, 0.82)            | 0.63 (0.57, 0.71)            | 0.78 (0.65, 0.94)            |
| <b>OUTCOME &gt; EVER LOOSE TEETH PAST 12-MONTH LOOSE TEETH</b>           |                              |                              |                              |
| Interdental cleaning                                                     | Adjusted Odds Ratio (95% CI) | Adjusted Odds Ratio (95% CI) | Adjusted Odds Ratio (95% CI) |
| None (reference)                                                         | --                           | --                           | --                           |
| 1-4 times/week                                                           | 0.93 (0.80, 1.08)            | 0.90 (0.73, 1.11)            | 0.99 (0.71, 1.36)            |
| ≥5 times/week                                                            | 0.83 (0.72, 0.96)            | 0.82 (0.67, 1.00)            | 0.95 (0.70, 1.30)            |
| <b>OUTCOME &gt; EVER BONE LOSS PAST 12-MONTH BONE LOSS</b>               |                              |                              |                              |
| Interdental cleaning                                                     | Adjusted Odds Ratio (95% CI) | Adjusted Odds Ratio (95% CI) | Adjusted Odds Ratio (95% CI) |
| None (reference)                                                         | --                           | --                           | --                           |
| 1-4 times/week                                                           | 1.33 (1.10, 1.61)            | 1.04 (0.77, 1.39)            | 1.18 (0.80, 1.73)            |
| ≥5 times/week                                                            | 1.60 (1.34, 1.91)            | 1.08 (0.82, 1.42)            | 1.03 (0.71, 1.48)            |
| <b>OUTCOME &gt; EVER GUM DISEASE PAST 12-MONTH GUM DISEASE</b>           |                              |                              |                              |
| Interdental cleaning                                                     | Adjusted Odds Ratio (95% CI) | Adjusted Odds Ratio (95% CI) | Adjusted Odds Ratio (95% CI) |
| None (reference)                                                         | --                           | --                           | --                           |
| 1-4 times/week                                                           | 1.10 (0.96, 1.27)            | 0.97 (0.73, 1.28)            | 0.66 (0.42, 1.03)            |
| ≥5 times/week                                                            | 1.08 (0.94, 1.24)            | 0.87 (0.67, 1.15)            | 0.55 (0.34, 0.87)            |

Cross-sectional models weighted using Wave 3 cross-sectional weights and survey weighting. Longitudinal models weighted using Wave 4 all-wave longitudinal weights and survey weighting. Analyses of new events restricted to respondents reporting no history of the outcome at Wave 3.

Abbreviation: CI = confidence interval



**Appendix Table 5. Associations between interdental cleaning and oral health: Wave 4 tooth brushing behavior included as model covariable**

|                                                      | Cross-Sectional              | Longitudinal                 | Longitudinal (New Events)    |
|------------------------------------------------------|------------------------------|------------------------------|------------------------------|
| <b>OUTCOME &gt; SELF-RATED ORAL HEALTH EXCELLENT</b> |                              |                              |                              |
| Interdental cleaning                                 | Adjusted Odds Ratio (95% CI) | Adjusted Odds Ratio (95% CI) |                              |
| None (reference)                                     | --                           | --                           |                              |
| 1-2 times/week                                       | 0.68 (0.58, 0.81)            | 0.82 (0.68, 0.98)            |                              |
| 3-4 times/week                                       | 0.83 (0.69, 0.99)            | 0.82 (0.68, 1.00)            |                              |
| 5-6 times/week                                       | 0.96 (0.80, 1.16)            | 1.04 (0.85, 1.26)            |                              |
| ≥7 times/week                                        | 1.27 (1.08, 1.48)            | 1.25 (1.06, 1.47)            |                              |
| <b>OUTCOME &gt; EVER TOOTH EXTRACTION</b>            |                              |                              |                              |
| <b>PAST 12-MONTH TOOTH EXTRACTION</b>                |                              |                              |                              |
| Interdental cleaning                                 | Adjusted Odds Ratio (95% CI) | Adjusted Odds Ratio (95% CI) | Adjusted Odds Ratio (95% CI) |
| None (reference)                                     | --                           | --                           | --                           |
| 1-2 times/week                                       | 1.53 (1.33, 1.76)            | 1.47 (1.20, 1.79)            | 1.22 (0.87, 1.71)            |
| 3-4 times/week                                       | 1.44 (1.23, 1.68)            | 1.14 (0.92, 1.42)            | 0.91 (0.63, 1.30)            |
| 5-6 times/week                                       | 1.45 (1.24, 1.70)            | 1.15 (0.90, 1.45)            | 0.55 (0.36, 0.83)            |
| ≥7 times/week                                        | 1.39 (1.23, 1.58)            | 1.15 (0.96, 1.38)            | 1.32 (0.97, 1.79)            |
| <b>OUTCOME &gt; EVER GUM BLEEDING</b>                |                              |                              |                              |
| <b>PAST 12-MONTH GUM BLEEDING</b>                    |                              |                              |                              |
| Interdental cleaning                                 | Adjusted Odds Ratio (95% CI) | Adjusted Odds Ratio (95% CI) | Adjusted Odds Ratio (95% CI) |
| None (reference)                                     | --                           | --                           | --                           |
| 1-2 times/week                                       | 1.30 (1.17, 1.46)            | 1.19 (1.05, 1.35)            | 1.24 (0.99, 1.55)            |
| 3-4 times/week                                       | 1.31 (1.16, 1.48)            | 1.12 (0.97, 1.28)            | 1.16 (0.90, 1.49)            |
| 5-6 times/week                                       | 1.06 (0.93, 1.22)            | 0.92 (0.79, 1.07)            | 0.85 (0.65, 1.12)            |
| ≥7 times/week                                        | 0.77 (0.69, 0.85)            | 0.69 (0.61, 0.78)            | 0.91 (0.73, 1.13)            |
| <b>OUTCOME &gt; EVER LOOSE TEETH</b>                 |                              |                              |                              |
| <b>PAST 12-MONTH LOOSE TEETH</b>                     |                              |                              |                              |
| Interdental cleaning                                 | Adjusted Odds Ratio (95% CI) | Adjusted Odds Ratio (95% CI) | Adjusted Odds Ratio (95% CI) |
| None (reference)                                     | --                           | --                           | --                           |
| 1-2 times/week                                       | 1.01 (0.85, 1.21)            | 1.06 (0.82, 1.35)            | 1.10 (0.76, 1.61)            |
| 3-4 times/week                                       | 1.14 (0.93, 1.39)            | 1.09 (0.83, 1.44)            | 1.20 (0.76, 1.88)            |
| 5-6 times/week                                       | 1.03 (0.83, 1.28)            | 0.26 (0.94, 1.68)            | 1.32 (0.87, 2.02)            |
| ≥7 times/week                                        | 1.01 (0.86, 1.19)            | 0.99 (0.77, 1.25)            | 1.14 (0.78, 1.65)            |
| <b>OUTCOME &gt; EVER BONE LOSS</b>                   |                              |                              |                              |
| <b>PAST 12-MONTH BONE LOSS</b>                       |                              |                              |                              |
| Interdental cleaning                                 | Adjusted Odds Ratio (95% CI) | Adjusted Odds Ratio (95% CI) | Adjusted Odds Ratio (95% CI) |
| None (reference)                                     | --                           | --                           | --                           |
| 1-2 times/week                                       | 1.29 (1.03, 1.62)            | 1.22 (0.87, 1.72)            | 1.60 (1.02, 2.52)            |
| 3-4 times/week                                       | 1.11 (0.88, 1.41)            | 0.98 (0.68, 1.41)            | 0.98 (0.59, 1.64)            |
| 5-6 times/week                                       | 1.41 (1.10, 1.80)            | 1.18 (0.82, 1.68)            | 1.21 (0.74, 1.98)            |
| ≥7 times/week                                        | 1.40 (1.16, 1.70)            | 1.19 (0.88, 1.62)            | 1.18 (0.77, 1.80)            |
| <b>OUTCOME &gt; EVER GUM DISEASE</b>                 |                              |                              |                              |
| <b>PAST 12-MONTH GUM DISEASE</b>                     |                              |                              |                              |
| Interdental cleaning                                 | Adjusted Odds Ratio (95% CI) | Adjusted Odds Ratio (95% CI) | Adjusted Odds Ratio (95% CI) |
| None (reference)                                     | --                           | --                           | --                           |
| 1-2 times/week                                       | 1.07 (0.91, 1.27)            | 1.06 (0.76, 1.49)            | 0.87 (0.50, 1.50)            |
| 3-4 times/week                                       | 1.10 (0.92, 1.31)            | 1.02 (0.72, 1.45)            | 0.50 (0.27, 0.93)            |
| 5-6 times/week                                       | 1.12 (0.93, 1.34)            | 1.14 (0.81, 1.61)            | 0.52 (0.28, 0.97)            |
| ≥7 times/week                                        | 1.03 (0.89, 1.20)            | 0.92 (0.68, 1.25)            | 0.64 (0.38, 1.06)            |

Cross-sectional models weighted using Wave 3 cross-sectional weights and survey weighting. Longitudinal models weighted using Wave 4 all-wave longitudinal weights and survey weighting. Analyses of new events restricted to respondents reporting no history of the outcome at Wave 3.

Abbreviation: CI = confidence interval

**Appendix Table 6. Longitudinal associations between interdental cleaning and oral health: collider bias assessment**

| Longitudinal Outcomes (Wave 4, All Events)                |                                  |                          |                            |                           |                         |                           |
|-----------------------------------------------------------|----------------------------------|--------------------------|----------------------------|---------------------------|-------------------------|---------------------------|
| OUTCOME >                                                 | SELF-RATED ORAL HEALTH EXCELLENT | PAST 12-MONTH EXTRACTION | PAST 12-MONTH GUM BLEEDING | PAST 12-MONTH LOOSE TEETH | PAST 12-MONTH BONE LOSS | PAST 12-MONTH GUM DISEASE |
| <b>Full sample</b>                                        |                                  |                          |                            |                           |                         |                           |
| Interdental cleaning                                      | AOR (95% CI)                     | AOR (95% CI)             | AOR (95% CI)               | AOR (95% CI)              |                         |                           |
| None                                                      | (reference)                      | (reference)              | (reference)                | (reference)               |                         |                           |
| 1-2 times/week                                            | 0.86 (0.72, 1.02)                | 1.42 (1.17, 1.73)        | 1.12 (0.99, 1.27)          | 0.99 (0.77, 1.27)         | N/A                     | N/A                       |
| 3-4 times/week                                            | 0.89 (0.74, 1.07)                | 1.10 (0.89, 1.37)        | 1.02 (0.89, 1.18)          | 1.01 (0.77, 1.33)         |                         |                           |
| 5-6 times/week                                            | 1.13 (0.93, 1.37)                | 1.10 (0.87, 1.40)        | 0.84 (0.72, 0.97)          | 1.15 (0.87, 1.53)         |                         |                           |
| ≥7 times/week                                             | 1.37 (1.17, 1.62)                | 1.10 (0.92, 1.32)        | 0.62 (0.54, 0.70)          | 0.89 (0.70, 1.12)         |                         |                           |
| <b>Restricted to Wave 4 past 12-month dental visitors</b> |                                  |                          |                            |                           |                         |                           |
| Interdental cleaning                                      | AOR (95% CI)                     | AOR (95% CI)             | AOR (95% CI)               | AOR (95% CI)              | AOR (95% CI)            | AOR (95% CI)              |
| None                                                      | (reference)                      | (reference)              | (reference)                | (reference)               | (reference)             | (reference)               |
| 1-2 times/week                                            | 0.88 (0.70, 1.10)                | 1.23 (0.93, 1.63)        | 1.04 (0.87, 1.24)          | 1.00 (0.67, 1.50)         | 1.20 (0.85, 1.68)       | 1.03 (0.74, 1.43)         |
| 3-4 times/week                                            | 0.89 (0.71, 1.13)                | 0.83 (0.62, 1.11)        | 1.01 (0.83, 1.22)          | 0.96 (0.63, 1.46)         | 0.95 (0.67, 1.36)       | 0.97 (0.69, 1.38)         |
| 5-6 times/week                                            | 1.26 (0.99, 1.60)                | 0.87 (0.64, 1.18)        | 0.83 (0.68, 1.01)          | 1.06 (0.70, 1.61)         | 1.14 (0.80, 1.62)       | 1.08 (0.77, 1.51)         |
| ≥7 times/week                                             | 1.42 (1.15, 1.74)                | 0.87 (0.68, 1.11)        | 0.55 (0.46, 0.65)          | 0.85 (0.59, 1.23)         | 1.15 (0.85, 1.55)       | 0.87 (0.65, 1.16)         |
| Longitudinal Outcomes (Wave 4, New Events Only)           |                                  |                          |                            |                           |                         |                           |
| OUTCOME >                                                 |                                  | PAST 12-MONTH EXTRACTION | PAST 12-MONTH GUM BLEEDING | PAST 12-MONTH LOOSE TEETH | PAST 12-MONTH BONE LOSS | PAST 12-MONTH GUM DISEASE |
| <b>Full sample</b>                                        |                                  |                          |                            |                           |                         |                           |
| Interdental cleaning                                      |                                  | AOR (95% CI)             | AOR (95% CI)               | AOR (95% CI)              |                         |                           |
| None                                                      |                                  | (reference)              | (reference)                | (reference)               |                         |                           |
| 1-2 times/week                                            |                                  | 1.22 (0.88, 1.71)        | 1.20 (0.96, 1.50)          | 1.05 (0.73, 1.53)         | N/A                     | N/A                       |
| 3-4 times/week                                            |                                  | 0.92 (0.65, 1.31)        | 1.12 (0.87, 1.43)          | 1.13 (0.73, 1.76)         |                         |                           |
| 5-6 times/week                                            |                                  | 0.56 (0.37, 0.85)        | 0.81 (0.62, 1.06)          | 1.25 (0.83, 1.88)         |                         |                           |
| ≥7 times/week                                             |                                  | 1.35 (1.01, 1.82)        | 0.86 (0.69, 1.06)          | 1.05 (0.73, 1.51)         |                         |                           |
| <b>Restricted to Wave 4 past 12-month dental visitors</b> |                                  |                          |                            |                           |                         |                           |
| Interdental cleaning                                      |                                  | AOR (95% CI)             | AOR (95% CI)               | AOR (95% CI)              | AOR (95% CI)            | AOR (95% CI)              |
| None                                                      |                                  | (reference)              | (reference)                | (reference)               | (reference)             | (reference)               |
| 1-2 times/week                                            |                                  | 1.20 (0.75, 1.92)        | 1.17 (0.86, 1.60)          | 1.04 (0.59, 1.83)         | 1.57 (1.02, 2.43)       | 0.91 (0.54, 1.53)         |
| 3-4 times/week                                            |                                  | 0.84 (0.52, 1.35)        | 1.21 (0.87, 1.70)          | 1.03 (0.56, 1.89)         | 0.96 (0.58, 1.58)       | 0.53 (0.28, 0.98)         |
| 5-6 times/week                                            |                                  | 0.51 (0.30, 0.88)        | 0.80 (0.56, 1.14)          | 0.95 (0.51, 1.75)         | 1.18 (0.73, 1.89)       | 0.56 (0.30, 1.04)         |
| ≥7 times/week                                             |                                  | 1.13 (0.76, 1.69)        | 0.83 (0.63, 1.10)          | 0.90 (0.53, 1.51)         | 1.14 (0.76, 1.71)       | 0.69 (0.41, 1.16)         |

Models weighted using Wave 4 all-wave longitudinal weights and survey weighting. Analyses of new events restricted to respondents reporting no history of the outcome at Wave 3. Abbreviations: AOR = adjusted odds ratio; CI = confidence interval; N/A = not applicable (survey did not assess these outcomes in the full sample)

**Appendix Table 7. Associations between interdental cleaning and oral health: complete case analysis with balanced repeated replicate weighting**

|                                                      | Cross-Sectional              | Longitudinal                 | Longitudinal (New Events)    |
|------------------------------------------------------|------------------------------|------------------------------|------------------------------|
| <b>OUTCOME &gt; SELF-RATED ORAL HEALTH EXCELLENT</b> |                              |                              |                              |
| Interdental cleaning                                 | Adjusted Odds Ratio (95% CI) | Adjusted Odds Ratio (95% CI) |                              |
| None (reference)                                     | --                           | --                           |                              |
| 1-2 times/week                                       | 0.69 (0.59, 0.81)            | 0.86 (0.70, 1.05)            |                              |
| 3-4 times/week                                       | 0.81 (0.68, 0.97)            | 0.90 (0.74, 1.10)            |                              |
| 5-6 times/week                                       | 0.94 (0.76, 1.15)            | 1.11 (0.89, 1.39)            |                              |
| ≥7 times/week                                        | 1.31 (1.11, 1.55)            | 1.38 (1.16, 1.64)            |                              |
| <b>OUTCOME &gt; EVER TOOTH EXTRACTION</b>            |                              |                              |                              |
| <b>PAST 12-MONTH TOOTH EXTRACTION</b>                |                              |                              |                              |
| Interdental cleaning                                 | Adjusted Odds Ratio (95% CI) | Adjusted Odds Ratio (95% CI) | Adjusted Odds Ratio (95% CI) |
| None (reference)                                     | --                           | --                           | --                           |
| 1-2 times/week                                       | 1.47 (1.26, 1.72)            | 1.33 (1.08, 1.65)            | 1.22 (0.83, 1.79)            |
| 3-4 times/week                                       | 1.44 (1.23, 1.68)            | 1.09 (0.88, 1.35)            | 0.95 (0.64, 1.42)            |
| 5-6 times/week                                       | 1.34 (1.16, 1.54)            | 1.05 (0.82, 1.35)            | 0.57 (0.38, 0.87)            |
| ≥7 times/week                                        | 1.34 (1.17, 1.53)            | 1.02 (0.87, 1.21)            | 1.27 (0.94, 1.70)            |
| <b>OUTCOME &gt; EVER GUM BLEEDING</b>                |                              |                              |                              |
| <b>PAST 12-MONTH GUM BLEEDING</b>                    |                              |                              |                              |
| Interdental cleaning                                 | Adjusted Odds Ratio (95% CI) | Adjusted Odds Ratio (95% CI) | Adjusted Odds Ratio (95% CI) |
| None (reference)                                     | --                           | --                           | --                           |
| 1-2 times/week                                       | 1.20 (1.06, 1.35)            | 1.15 (0.99, 1.33)            | 1.20 (0.95, 1.51)            |
| 3-4 times/week                                       | 1.24 (1.08, 1.41)            | 1.07 (0.91, 1.26)            | 1.17 (0.87, 1.57)            |
| 5-6 times/week                                       | 0.97 (0.85, 1.11)            | 0.84 (0.71, 1.00)            | 0.83 (0.62, 1.11)            |
| ≥7 times/week                                        | 0.71 (0.63, 0.79)            | 0.64 (0.55, 0.74)            | 0.90 (0.71, 1.15)            |
| <b>OUTCOME &gt; EVER LOOSE TEETH</b>                 |                              |                              |                              |
| <b>PAST 12-MONTH LOOSE TEETH</b>                     |                              |                              |                              |
| Interdental cleaning                                 | Adjusted Odds Ratio (95% CI) | Adjusted Odds Ratio (95% CI) | Adjusted Odds Ratio (95% CI) |
| None (reference)                                     | --                           | --                           | --                           |
| 1-2 times/week                                       | 1.00 (0.84, 1.19)            | 0.93 (0.73, 1.19)            | 1.02 (0.65, 1.60)            |
| 3-4 times/week                                       | 1.12 (0.91, 1.38)            | 0.97 (0.75, 1.27)            | 1.09 (0.66, 1.78)            |
| 5-6 times/week                                       | 0.96 (0.74, 1.25)            | 1.11 (0.76, 1.62)            | 1.15 (0.75, 1.76)            |
| ≥7 times/week                                        | 1.01 (0.86, 1.19)            | 0.84 (0.64, 1.10)            | 0.96 (0.64, 1.44)            |
| <b>OUTCOME &gt; EVER BONE LOSS</b>                   |                              |                              |                              |
| <b>PAST 12-MONTH BONE LOSS</b>                       |                              |                              |                              |
| Interdental cleaning                                 | Adjusted Odds Ratio (95% CI) | Adjusted Odds Ratio (95% CI) | Adjusted Odds Ratio (95% CI) |
| None (reference)                                     | --                           | --                           | --                           |
| 1-2 times/week                                       | 1.31 (1.01, 1.70)            | 1.21 (0.84, 1.75)            | 1.67 (1.01, 2.77)            |
| 3-4 times/week                                       | 1.15 (0.88, 1.51)            | 0.96 (0.65, 1.40)            | 1.00 (0.54, 1.85)            |
| 5-6 times/week                                       | 1.35 (1.06, 1.73)            | 1.08 (0.74, 1.59)            | 1.23 (0.74, 2.06)            |
| ≥7 times/week                                        | 1.43 (1.15, 1.78)            | 1.16 (0.85, 1.59)            | 1.21 (0.78, 1.88)            |
| <b>OUTCOME &gt; EVER GUM DISEASE</b>                 |                              |                              |                              |
| <b>PAST 12-MONTH GUM DISEASE</b>                     |                              |                              |                              |
| Interdental cleaning                                 | Adjusted Odds Ratio (95% CI) | Adjusted Odds Ratio (95% CI) | Adjusted Odds Ratio (95% CI) |
| None (reference)                                     | --                           | --                           | --                           |
| 1-2 times/week                                       | 1.06 (0.88, 1.27)            | 1.08 (0.73, 1.59)            | 0.95 (0.52, 1.75)            |
| 3-4 times/week                                       | 1.05 (0.87, 1.28)            | 1.06 (0.71, 1.58)            | 0.58 (0.28, 1.21)            |
| 5-6 times/week                                       | 1.04 (0.85, 1.26)            | 1.18 (0.81, 1.72)            | 0.64 (0.32, 1.29)            |
| ≥7 times/week                                        | 1.01 (0.86, 1.19)            | 0.92 (0.66, 1.28)            | 0.72 (0.41, 1.27)            |

Cross-sectional models weighted using Wave 3 cross-sectional weights and balanced repeated replicate weighting. Longitudinal models weighted using Wave 4 all-wave longitudinal weights and balanced repeated replicate weighting. Analyses of new events restricted to respondents reporting no history of the outcome at Wave 3. All analyses restricted to observations with no missing data. Abbreviation: CI = confidence interval

**Appendix Table 8. Associations between interdental cleaning and oral health: complete case analysis with survey weighting**

|                                                                          | Cross-Sectional              | Longitudinal                 | Longitudinal (New Events)    |
|--------------------------------------------------------------------------|------------------------------|------------------------------|------------------------------|
| <b>OUTCOME &gt; SELF-RATED ORAL HEALTH EXCELLENT</b>                     |                              |                              |                              |
| Interdental cleaning                                                     | Adjusted Odds Ratio (95% CI) | Adjusted Odds Ratio (95% CI) |                              |
| None (reference)                                                         | --                           | --                           |                              |
| 1-2 times/week                                                           | 0.69 (0.58, 0.82)            | 0.86 (0.71, 1.03)            |                              |
| 3-4 times/week                                                           | 0.81 (0.67, 0.98)            | 0.90 (0.74, 1.10)            |                              |
| 5-6 times/week                                                           | 0.94 (0.77, 1.14)            | 1.11 (0.91, 1.36)            |                              |
| ≥7 times/week                                                            | 1.31 (1.11, 1.55)            | 1.38 (1.16, 1.63)            |                              |
| <b>OUTCOME &gt; EVER TOOTH EXTRACTION PAST 12-MONTH TOOTH EXTRACTION</b> |                              |                              |                              |
| Interdental cleaning                                                     | Adjusted Odds Ratio (95% CI) | Adjusted Odds Ratio (95% CI) | Adjusted Odds Ratio (95% CI) |
| None (reference)                                                         | --                           | --                           | --                           |
| 1-2 times/week                                                           | 1.47 (1.27, 1.71)            | 1.33 (1.08, 1.64)            | 1.22 (0.85, 1.75)            |
| 3-4 times/week                                                           | 1.44 (1.22, 1.69)            | 1.09 (0.87, 1.37)            | 0.95 (0.66, 1.39)            |
| 5-6 times/week                                                           | 1.34 (1.13, 1.58)            | 1.05 (0.82, 1.35)            | 0.57 (0.37, 0.89)            |
| ≥7 times/week                                                            | 1.34 (1.17, 1.53)            | 1.02 (0.85, 1.24)            | 1.27 (0.92, 1.75)            |
| <b>OUTCOME &gt; EVER GUM BLEEDING PAST 12-MONTH GUM BLEEDING</b>         |                              |                              |                              |
| Interdental cleaning                                                     | Adjusted Odds Ratio (95% CI) | Adjusted Odds Ratio (95% CI) | Adjusted Odds Ratio (95% CI) |
| None (reference)                                                         | --                           | --                           | --                           |
| 1-2 times/week                                                           | 1.20 (1.07, 1.35)            | 1.15 (1.01, 1.31)            | 1.20 (0.95, 1.52)            |
| 3-4 times/week                                                           | 1.24 (1.09, 1.41)            | 1.07 (0.93, 1.24)            | 1.17 (0.90, 1.51)            |
| 5-6 times/week                                                           | 0.97 (0.84, 1.12)            | 0.84 (0.72, 0.99)            | 0.83 (0.62, 1.10)            |
| ≥7 times/week                                                            | 0.71 (0.63, 0.79)            | 0.64 (0.56, 0.73)            | 0.90 (0.72, 1.13)            |
| <b>OUTCOME &gt; EVER LOOSE TEETH PAST 12-MONTH LOOSE TEETH</b>           |                              |                              |                              |
| Interdental cleaning                                                     | Adjusted Odds Ratio (95% CI) | Adjusted Odds Ratio (95% CI) | Adjusted Odds Ratio (95% CI) |
| None (reference)                                                         | --                           | --                           | --                           |
| 1-2 times/week                                                           | 1.00 (0.83, 1.20)            | 0.93 (0.71, 1.21)            | 1.02 (0.68, 1.53)            |
| 3-4 times/week                                                           | 1.12 (0.90, 1.39)            | 0.97 (0.73, 1.30)            | 1.09 (0.68, 1.73)            |
| 5-6 times/week                                                           | 0.96 (0.76, 1.21)            | 1.11 (0.82, 1.49)            | 1.15 (0.74, 1.78)            |
| ≥7 times/week                                                            | 1.01 (0.85, 1.20)            | 0.84 (0.65, 1.08)            | 0.96 (0.65, 1.43)            |
| <b>OUTCOME &gt; EVER BONE LOSS PAST 12-MONTH BONE LOSS</b>               |                              |                              |                              |
| Interdental cleaning                                                     | Adjusted Odds Ratio (95% CI) | Adjusted Odds Ratio (95% CI) | Adjusted Odds Ratio (95% CI) |
| None (reference)                                                         | --                           | --                           | --                           |
| 1-2 times/week                                                           | 1.31 (1.03, 1.66)            | 1.21 (0.85, 1.73)            | 1.67 (1.05, 2.65)            |
| 3-4 times/week                                                           | 1.15 (0.90, 1.47)            | 0.96 (0.66, 1.39)            | 1.00 (0.58, 1.72)            |
| 5-6 times/week                                                           | 1.35 (1.05, 1.74)            | 1.08 (0.75, 1.57)            | 1.23 (0.74, 2.04)            |
| ≥7 times/week                                                            | 1.43 (1.18, 1.75)            | 1.16 (0.85, 1.59)            | 1.21 (0.79, 1.85)            |
| <b>OUTCOME &gt; EVER GUM DISEASE PAST 12-MONTH GUM DISEASE</b>           |                              |                              |                              |
| Interdental cleaning                                                     | Adjusted Odds Ratio (95% CI) | Adjusted Odds Ratio (95% CI) | Adjusted Odds Ratio (95% CI) |
| None (reference)                                                         | --                           | --                           | --                           |
| 1-2 times/week                                                           | 1.06 (0.89, 1.26)            | 1.08 (0.76, 1.53)            | 0.95 (0.54, 1.70)            |
| 3-4 times/week                                                           | 1.05 (0.87, 1.27)            | 1.06 (0.74, 1.52)            | 0.58 (0.30, 1.14)            |
| 5-6 times/week                                                           | 1.04 (0.85, 1.26)            | 1.18 (0.83, 1.69)            | 0.64 (0.33, 1.22)            |
| ≥7 times/week                                                            | 1.01 (0.87, 1.18)            | 0.92 (0.68, 1.26)            | 0.72 (0.40, 1.30)            |

Cross-sectional models weighted using Wave 3 cross-sectional weights and survey weighting. Longitudinal models weighted using Wave 4 all-wave longitudinal weights and survey weighting. Analyses of new events restricted to respondents reporting no history of the outcome at Wave 3. All analyses restricted to observations with no missing data. Abbreviation: CI = confidence interval
